# Supplementary material for: Treatment outcome according to genetic tumour alterations and clinical characteristics in digestive high-grade neuroendocrine neoplasms
Source: PubMed Central journal article supplement (PMC11333587; doi:10.1038/s41416-024-02773-w), 2024-06-22

# Altered in 32 (78.05%) of 41 samples.

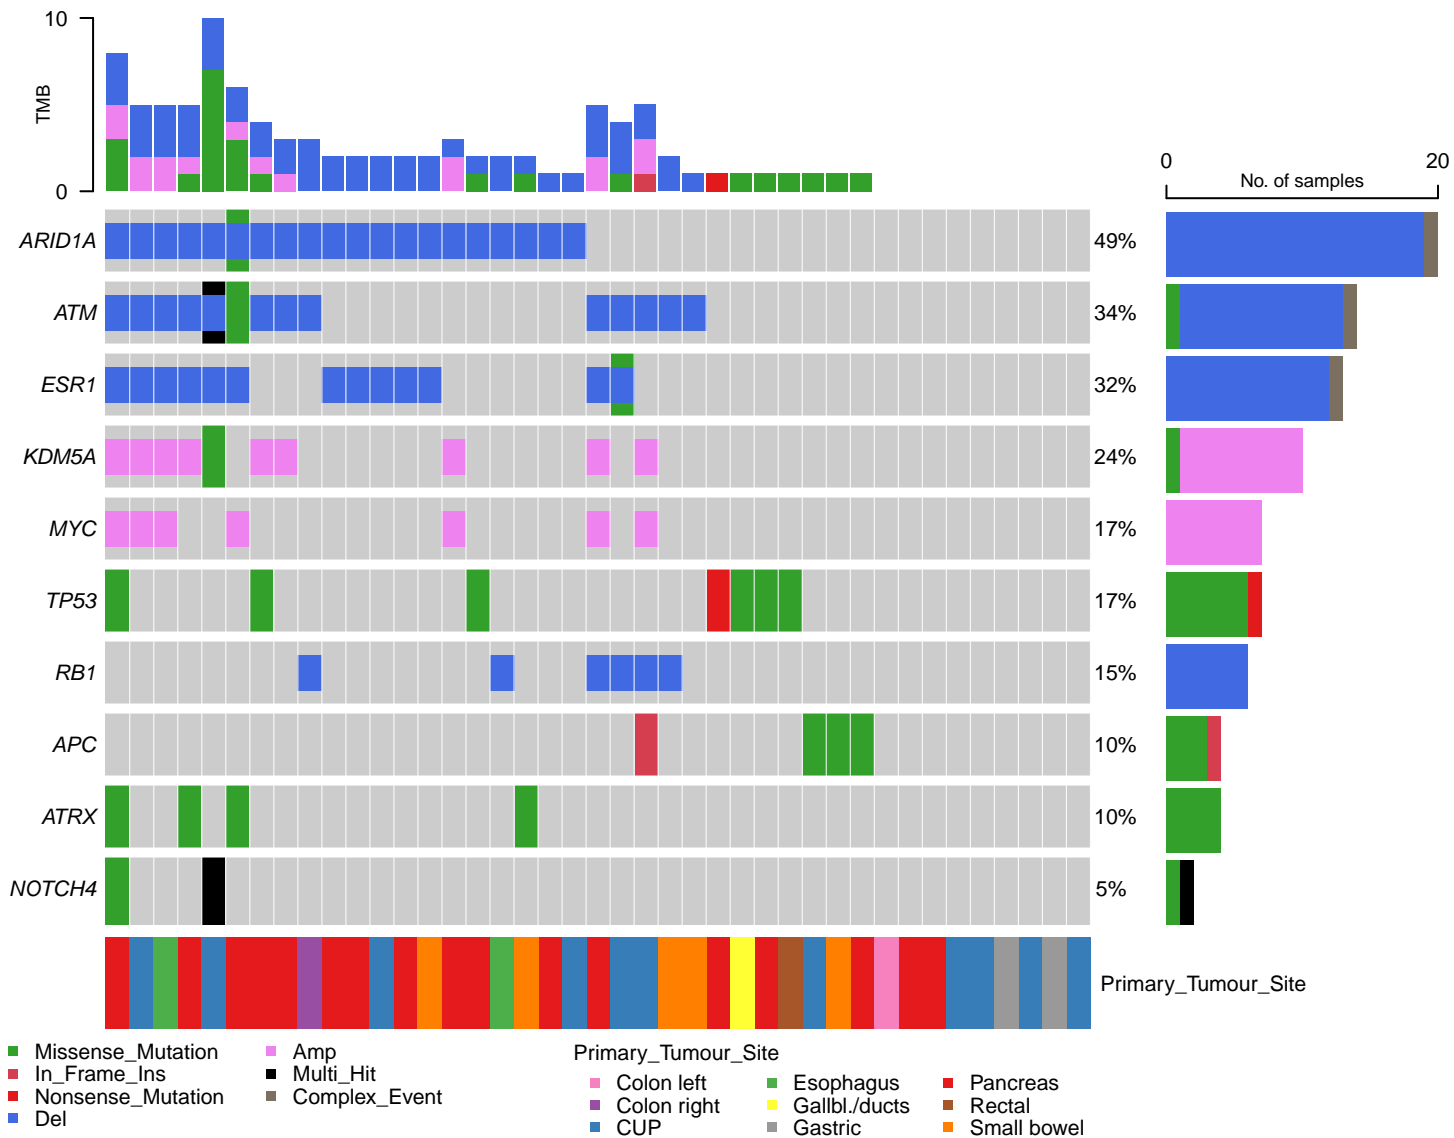

Supplement: 41416_2024_2773_MOESM3_ESM.pdf [file 41416_2024_2773_MOESM3_ESM.pdf]
